# Supplementary material
Source: PubMed Central journal article supplement (PMC3445983)
Supplement: EC.00123-12_zek999093951so1.pdf [file EC.00123-12_zek999093951so1.pdf]

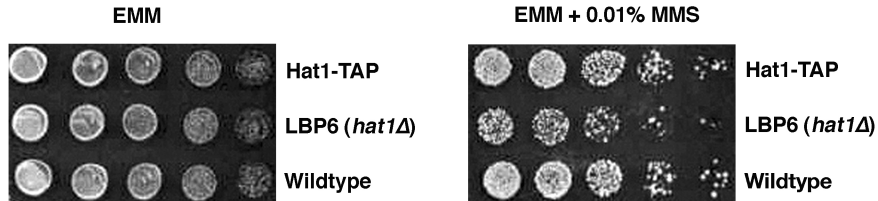

**Fig. S1**

**Figure S1.** *Hat1-TAP is functional.* Wildtype (975) and Hat1-TAP (KTP1) *S. pombe* strains were cultured on EMM plates in the presence or absence of 0.01% MMS. Cells were grown three (EMM) or four (EMM + 0.01% MMS) days at 30°. LBP6: *hat1Δ*.

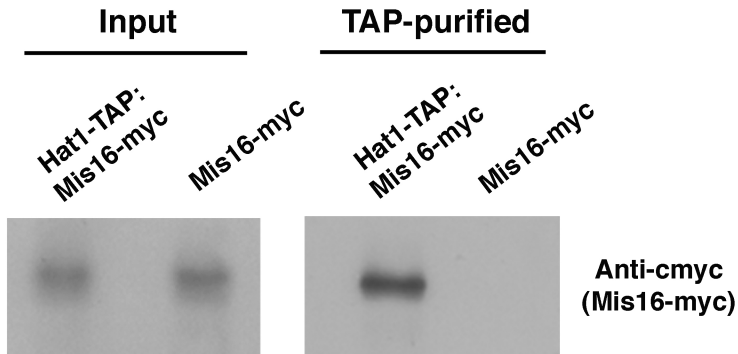

**Fig. S2**

**Figure S2.** *Hat1-TAP* and *Mis16-myc* are associated in a complex. *S. Pombe* strains *Hat1-TAP: Mis16-myc* (KTP40) and *Mis16-myc* (control strain with untagged *Hat1*) were subjected to tandem affinity purification. Proteins from Input and TAP-purified fractions were subjected to SDS-PAGE and western blot analysis using antibodies against c-myc.

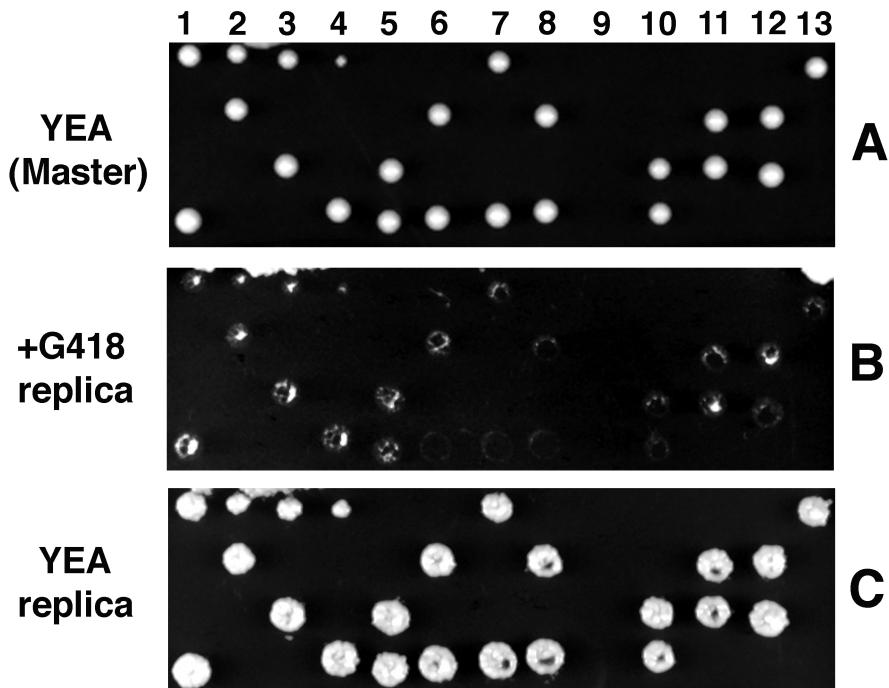

**Fig. S3**

**Figure S3.** *mis16* is an essential gene. *S. pombe* strain KTP7, heterozygous for deletion of *mis16* (*mis16+ / mis16Δ::kan*) was sporulated on MEA plates. (A) Tetrads were dissected on YEA plates. Spores were allowed to grow for 3 days at 30° prior to replica plating onto (B) G418 (400 μg/ml) and (C) YEA plates. Replica-plated colonies were allowed to grow for 2 days. **Note:** Substantial colony growth was not observed on medium containing G418, indicating that the viable cells in Panel A are wildtype for *mis16*. Thus the nonviable cells in panel A are *mis16Δ*.

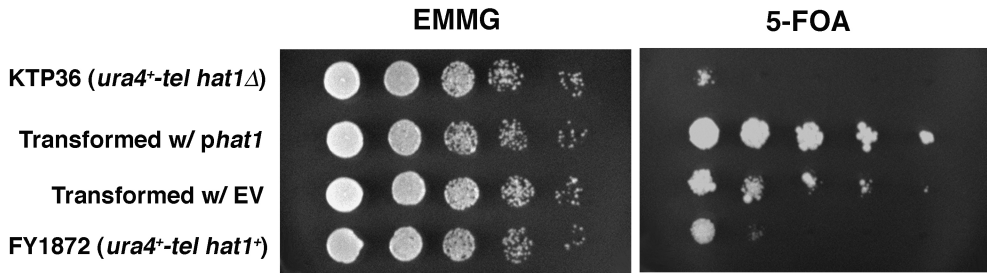

**Fig. S4**

**Figure S4.** *Hat1* expressed from a plasmid restores telomeric silencing. The *ura4-tel, hat1Δ* strain (**KTP36**) was transformed with an empty vector (EV) or a plasmid containing *hat1* controlled by an *nmt1* promoter (*phat1*). Transformed cells were cultured on EMMG plates in the presence or absence of 5-FOA. Spot cultures represent 5-fold serial dilutions. Cells were grown for two (EMMG) or three days (5-FOA) at 30°. **FY1872:** *ura4-tel, hat1<sup>+</sup>*; **KTP36:** *ura4-tel, hat1Δ*. Note: the slight growth of KTP36 after transformation with the empty vector is likely due to the inherent mutagenicity of transformation.

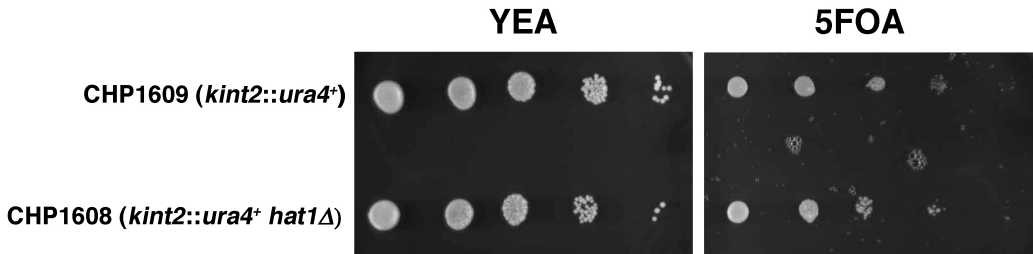

**Fig. S5**

**Figure S5.** *hat1* deletion does not result in the loss of silencing at the mating-type locus. Wildtype and experimental yeast strains were cultured on YEA plates in the presence (5FOA) or absence (YEA) of 5FOA. Spot cultures represent 10-fold dilutions. Cells were grown for three days at 30°.

**CHP1609:** *ura4*-silent mating-type locus marker; **CHP1608:** *ura4*-mating-type locus marker, *hat1Δ*. The *ura4* marker is silent in both strains.
